# Supplementary material for: lncRNA HCG11 suppresses human osteosarcoma growth through upregulating p27 Kip1
Source: publisher site journal article supplement (doi:10.18632/aging.203517), 2021-09-13
Supplement: Supplementary file [file aging-v13i17-203517-supplementary-material-SD2.pdf]

## SUPPLEMENTARY TABLE

Supplementary Table 1. Target sequences of shRNAs used in this study.

| shRNAs         | Target sequences (5'-3') |
|----------------|--------------------------|
| HCG11 shRNA#1  | GCAGAUUAGUCGAAUCAA       |
| HCG11 shRNA#2  | CACAGAAGUUCAUGUUUAA      |
| HCG11 shRNA#3  | GAAGGAGCACAAAGUCAA       |
| YY1 shRNA      | GAACUCACCUCCUGAUUUAU     |
| p27 Kip1 shRNA | UAGGAUAAGUGAAAUGGAUA     |
| IGF2BP2 shRNA  | GAUCUUUGGGAAACUGAAA      |
